# Supplementary material for: Stem Cells and Bone Tissue Engineering
Source: MDPI journal article supplement (doi:10.3390/life14030287), 2024-02-21
Supplement: s1 [file s1]

Supplemental Table S1: Summarized bone formation factors and scaffold used for different stem cell mediated bone formation.

| Stem cells Sources | Growth factors or functional small molecules | Scaffold                                                                                                           | Bone regeneration effects                 | Cited references |
|--------------------|----------------------------------------------|--------------------------------------------------------------------------------------------------------------------|-------------------------------------------|------------------|
| BMMSCs             | miRNA21                                      | TCP                                                                                                                | Enhanced bone repair                      | [12, 13, 15]     |
|                    |                                              | Gadomium-bioglass with chitosan microsphere                                                                        | Enhanced defect repair                    | [14]             |
|                    |                                              | Calcium deficient hydroxyapatite                                                                                   | Regenerated bone better than TCP          | [16]             |
|                    | PRP                                          | Calcium phosphate cement (CPC)                                                                                     | Regenerated bone better than CPC          | [17]             |
|                    |                                              | Graphene oxide methacrylated gelatin (GO-GelMA) or silica-coated graphene oxide methacrylated gelatin (SiGO/GelMA) | Regenerated bone better than GelMA        | [18]             |
|                    |                                              | HBMMSCs derived extracellular matrix                                                                               | Enhanced bone formation                   | [19, 25]         |
|                    |                                              | GO modified Silk fibroin                                                                                           | Promoted osteogenic differentiation       | [20]             |
|                    |                                              | Photo crosslinked GelMA                                                                                            | Increased bone formation                  | [22]             |
|                    |                                              | Rotary jet spinning (RJS) PCL carbon nanotube                                                                      | Significant increased bone formation      | [23]             |
|                    |                                              | Hetero-nanolayer with black phosphorus and GO                                                                      | Improved defect healing                   | [24]             |
|                    |                                              | Fibrin-bioink-PCL fiber                                                                                            | Enhance bone healing better than Collagen | [27]             |
|                    |                                              | Hydroxyapatite mineralized Antheraea pernyi fibroin                                                                | Increased bone matrix proteins in vivo    | [28]             |
|                    |                                              | Air-plasma treated silk fibroin                                                                                    | Increased bone matrix in ectopic model    | [29]             |

|       |                                              |                                                                                                        |                                                                 |                    |
|-------|----------------------------------------------|--------------------------------------------------------------------------------------------------------|-----------------------------------------------------------------|--------------------|
|       | TGF- $\beta$ 1+BMP2                          | MSCs tube                                                                                              | More robust bone formation than MSCs sheet                      | [30]               |
|       | BMP6                                         | Nano-hydroxyapatite (nHA)/gelatin (Gel)/gelatin microsphere (GMS)                                      | Significantly accelerated bone regeneration                     | [31]               |
|       | BMP2                                         | Hydroxyapatite viscoelastic gel                                                                        | Enhanced bone formation                                         | [32]               |
|       | BMP2 peptide                                 | BMP2 peptide fused to Bombyx mori silk fibroin                                                         | Stimulated bone formation in subcutaneous model                 | [33]               |
|       | Exosome                                      | MeGC hydrogel ,3D-printed titanium alloy scaffold, mesoporous bioactive glass (MBG), fibronectin (RGD) | Enhanced calvarial and long bone defect                         | [34-37]            |
| MDSCs | Adeno-BMP2,<br>retro-BMP2,BMP4<br>Lenti-BMP2 | Collagen sponge, Fibrin sealant                                                                        | Completely healed defect in 4-6 weeks                           | [45, 48-55, 57-62] |
| ADSCs |                                              | PLGA scaffold                                                                                          | Enhanced Complete healing                                       | [66]               |
|       |                                              | Fibrin sealant                                                                                         | Near complete healing                                           | [67]               |
|       |                                              | Hydroxyapatite (HA)-poly(lactic-co-glycolic acid                                                       | Enhanced bone defect healing by fresh HADSCs not frozen HMDSCs. | [68]               |
|       |                                              | PCL/ $\beta$ -tricalcium phosphate ( $\beta$ -TCP) scaffolds                                           | Enhanced radial defect healing                                  | [69]               |
|       |                                              | Hydroxyapatite/poly(lactide-co-glycolide)                                                              | Not significant improved bone healing using rat ADSCs           | [70]               |
|       |                                              | Decellularized bone scaffold                                                                           | 7/8 femur bone defect bridging                                  | [71]               |

|  |                                     |                                                          |                                                                                    |      |
|--|-------------------------------------|----------------------------------------------------------|------------------------------------------------------------------------------------|------|
|  |                                     | Heterogenous deproteinized bone matrix                   | Completely regenerated radial defect after pre-osteogenic differentiation in vitro | [72] |
|  |                                     | Polylysine (PLL)-modified coralline hydroxyapatite (CHA) | Completely healed the radial defect with lamellar bone                             | [74] |
|  |                                     | Tricalcium phosphates (TCP) and a PLGA scaffold          | Regenerated bone in mandible defect than no cell control.                          | [75] |
|  | Adeno-BMP2                          | Collagen ceramic carrier                                 | Completely healed femur defect compared to no healing with cells only.             | [76] |
|  | Baculovirus-BMP2 and CRISPRi-Noggin | Spongostan gelatin sponge                                | Enhanced bone defect healing in calvarial bone defect                              | [77] |
|  | BMP2                                | Apatite-coated porous poly(l-lactide-co-dl-lactide)      | Enhanced femoral bone defect healing, but not better than BMP2 alone.              | [78] |
|  | BMP7                                | PCL/ $\beta$ -TCP/DBM                                    | Significantly enhanced bone regeneration in canine femur bone defect               | [79] |
|  | BMP6                                | N/A                                                      | Formed bone ossicle after in vitro chondrogenic differentiation                    | [80] |
|  | PDGF                                | Bio-mineral coated fibers                                | Enhanced bone healing                                                              | [81] |

|  |                                                                                                |                                                                          |                                                                          |      |
|--|------------------------------------------------------------------------------------------------|--------------------------------------------------------------------------|--------------------------------------------------------------------------|------|
|  |                                                                                                |                                                                          | in calvarial bone defect                                                 |      |
|  | BMP2                                                                                           | N/A                                                                      | Enhanced bone regeneration in osteonecrosis femur head                   | [82] |
|  | Phenamil+BMP2                                                                                  | Poly(lactic-co-glycolic acid) and apatite layer                          | Enhanced calvarial defect healing                                        | [83] |
|  | LLP2A-Alendronate (LLP2A-Ale)                                                                  | N/A                                                                      | Enhanced femur fracture healing by attract ADSCs to fracture site        | [84] |
|  | DKK1 antibody                                                                                  | N/A                                                                      | Promoted femur defect healing by increase ADSCs survival and engraftment | [85] |
|  | Hedgehog modifier(recombinant N-terminal Sonic hedgehog, smoothened agonist, and cyclopamine). | Apatite-coated poly(lactic-co-glycolic acid) (PLGA) scaffolds            | Enhanced calvarial bone defect healing                                   | [86] |
|  | Human Exosome                                                                                  | Polydopamine-coating poly(lactic-co-glycolic acid) (PLGA/pDA)            | Enhanced calvarial bone defect healing                                   | [87] |
|  | Human miR-375 enriched exosome                                                                 | Thiol - modified hyaluronan, hydroxyapatite and thiol - modified heparin | Promoted calvarial bone defect healing                                   | [88] |
|  | Human Exosome                                                                                  | PLGA/Exo-Mg-GA metal-organic framework (MOF)                             | Promoted new bone formation                                              | [89] |
|  | Rat exosome                                                                                    | DMPE-PEG-CREKA                                                           | Enhanced bone repair                                                     | [90] |
|  | miR-450b,                                                                                      | N/A                                                                      | Enhanced ectopic bone formation                                          | [91] |
|  | miR-150-5p                                                                                     | Hydroxyapatite/tricalcium phosphate (HA/TCP)                             | Enhanced bone formation by inhibiting                                    | [92] |

|               |                     |                                                                                                   |                                                                           |       |
|---------------|---------------------|---------------------------------------------------------------------------------------------------|---------------------------------------------------------------------------|-------|
|               |                     |                                                                                                   | miRNA0150-5P                                                              |       |
| DPSCs/PDLS Cs |                     | N/A                                                                                               | Increased Lamella bone                                                    | [97]  |
|               |                     | Hydroxyapatite/TCP scaffolds                                                                      | Increased bone formation in vivo                                          | [98]  |
|               |                     | Collagen gel constructs                                                                           | Improved calvarial bone defect healing                                    | [100] |
|               |                     | Bio-Oss® scaffold                                                                                 | Repaired bone defect of rabbit alveolar toothless jaw                     | [101] |
|               | BMP2                | Tyrosine-derived polycarbonate polymer scaffolds [E1001(1k)] containing beta-tricalcium phosphate | Enhanced mandibular ramus critical bone defect healing but less than BMP2 | [102] |
|               | Combined with HUVEC | Tyrosine-derived polycarbonate polymer scaffolds [E1001(1k)] containing beta-tricalcium phosphate | Enhanced jaw bone defect healing than hDPSCs alone                        | [103] |
|               |                     | $\beta$ -tricalcium phosphate                                                                     | Enhanced human periodontal defect healing                                 | [104] |
|               |                     | DPSC cells sheet                                                                                  | Improved miniature pig periodontitis with bone defects                    | [105] |
|               |                     | DPSC-CellSaic                                                                                     | Improved rat congenital cleft fracture bone formation                     | [106] |
|               |                     | Ceramic nanocomposites of hydroxyapatite/titania /calcium silicate                                | Improved rabbit tibia defect healing                                      | [107] |
|               |                     | Collagen matrix                                                                                   | No benefit for human post-extraction                                      | [108] |

|  |                                                                                      |                             |                                                                            |       |
|--|--------------------------------------------------------------------------------------|-----------------------------|----------------------------------------------------------------------------|-------|
|  |                                                                                      |                             | sockets of impacted mandibular third molars                                |       |
|  | Lenti-Pannexin3                                                                      | $\beta$ -TCP scaffold       | Increased bone formation in critical size calvarial bone defects           | [109] |
|  | Adeno-SIRT1                                                                          | N/A                         | Enhanced distraction osteogenesis                                          | [110] |
|  | Lenti-ephrinB2                                                                       | PuraMatrix Peptide Hydrogel | Enhanced canine alveolar bone formation and quality                        | [111] |
|  | ETV2                                                                                 | $\beta$ -TCP scaffold       | Enhanced rat calvarial bone defect healing and mice ectopic bone formation | [112] |
|  | helioxanthin derivative, 4-(4-methoxyphenyl)pyrido[4,3-b]pyridine-2-carboxamide (TH) | Cell sheet                  | Enhanced tibia fracture repair                                             | [113] |
|  | chrysin                                                                              | $\beta$ -TCP scaffold       | Enhanced ectopic bone formation and calvarial bone defect healing          | [114] |
|  | melatonin                                                                            | MBCP scaffold               | Repaired Better than scaffold control but not DPSC only.                   | [115] |
|  | SOST ab or Knockout SOST in cells                                                    | Collagen hydrogel           | Improved bone regeneration in WT mice and SOSTKO mice                      | [116] |
|  | Human PDLSCs exosome                                                                 | $\beta$ -TCP scaffold       | Accelerated bone                                                           | [117] |

|        |                              |                                                                          |                                                                |       |
|--------|------------------------------|--------------------------------------------------------------------------|----------------------------------------------------------------|-------|
|        |                              |                                                                          | formation in alveolar bone defects                             |       |
|        | Human Extracellular vesicles | Matrigel                                                                 | Enhanced alveolar bone defect healing                          | [118] |
| PSCs   | FGF2                         | Calcium phosphate-collagen scaffold                                      | Completely healed femoral defect                               | [120] |
|        | BMP6                         | Calcium phosphate scaffold with intermediate release of Ca <sup>2+</sup> | Robust bone formation in ectopic bone model                    | [121] |
|        | BMP2 or BMP6                 | Ceramic dicalciumphosphate scaffold (CapiOs®)                            | Promoted sheep 4.5cm biological exhausted tibia defect healing | [122] |
|        | Periostin                    | N/A                                                                      | Rescued HIFa KO PSC bone regeneration                          | [123] |
|        |                              | N/A                                                                      | Promoted bone formation in ectopic bone formation model.       | [124] |
|        | Secretome                    | Bioceramic xenograft scaffold                                            | Promoted rabbit calvarial bone defect healing                  | [126] |
| AFDSCs | BMP7                         | Nanofibrous scaffolds                                                    | Enhanced bone formation in subcutaneous ectopic bone formation | [127] |
|        |                              | Collagen scaffold                                                        | Enhanced calvarial defect healing                              | [100] |
|        |                              | 30% Nano-hydroxyapatite chitosan scaffold                                | Completely healed rabbit defect healing in 4 weeks             | [129] |

|         |                                          |                                                                                                                         |                                                                      |       |
|---------|------------------------------------------|-------------------------------------------------------------------------------------------------------------------------|----------------------------------------------------------------------|-------|
|         |                                          | Human AFDSCs cell sheet                                                                                                 | Enhanced calvarial bone healing                                      | [130] |
|         | PRP                                      | N/A                                                                                                                     | Repaired alveolar bone defect                                        | [131] |
|         | PRP                                      | Random polycaprolactone (PCL) fibrous scaffolds                                                                         | Enhanced calvarial defect                                            | [132] |
| PBMSCs  |                                          | Porous calcium phosphate resorbable scaffold                                                                            | Enhanced Ulna defect repair                                          | [133] |
|         |                                          | HA/TCP                                                                                                                  | Enhanced root canal defect healing                                   | [134] |
|         | Combine with peripheral epithelia cells  | Biphasic calcium phosphate bioceramic (BCPB) scaffold                                                                   | Enhanced rabbit long bone defect                                     | [135] |
|         | Combine with peripheral epithelial cells | 3D-printed biphasic calcium phosphate (BCP) scaffold with highly bioactive nano hy-droxyapatite (nHA) coating (nHA/BCP) | Enhanced rabbit femur long bone defect                               | [136] |
|         |                                          | Hydroxyapatite-poly(lactic-coglycolic acid) (HA-PLGA) scaffolds                                                         | Induced bone healing in calvarial bone defect                        | [137] |
|         |                                          | Porous and resorbable $\beta$ -tricalcium phosphate ( $\beta$ -TCP) scaffolds                                           | Regenerated bone in ectopic bone formation model.                    | [138] |
| UC-MSCs |                                          | Biomimetic artificial bone scaffold                                                                                     | Formed bone in ectopic bone formation model                          | [139] |
|         | pEGFP-OSX plasmid                        | PLGA scaffold                                                                                                           | Promoted bone formation in subcutaneous ectopic bone formation model | [140] |
|         |                                          | Intra-venous infusion                                                                                                   | Decreased necrotic volume of ONFH of human                           | [141] |
|         |                                          | Bio-Oss® scaffold                                                                                                       | Significantly enhanced                                               | [142] |



|       |               |                                                                                                             |                                                                       |       |
|-------|---------------|-------------------------------------------------------------------------------------------------------------|-----------------------------------------------------------------------|-------|
|       |               |                                                                                                             | calvarial bone defect healing in nude rat                             |       |
|       | miR-196a-5p   | N/A                                                                                                         | Promoted calvarial bone defect healing                                | [143] |
|       | Human Exosome | Injectable hydroxyapatite (HAP)-embedded in situ cross-linked hyaluronic acid-alginate (HA-ALG) hydrogel    | Significantly enhanced bone regeneration in rat calvarial bone defect | [144] |
|       | Human Exosome | Systemic injection                                                                                          | Prevented bone loss, maintained bone mass                             | [145] |
|       | Human exosome | Chitosan/hydroxyapatite (CS/HA) scaffold                                                                    | Regenerated significantly more bone in rat calvarial bone defect      | [147] |
| UDSCs |               | $\beta$ -TCP                                                                                                | Healed rat femur segmental defect                                     | [148] |
|       | Lenti-BMP2    | $\beta$ -TCP                                                                                                | Enhanced ectopic bone formation in rat muscle pocket model            | [149] |
|       |               | Calcium silicate (CS) particles incorporated into poly (lactic-co-glycolic acid) (PLGA) composite scaffolds | Enhanced ectopic bone formation in muscle pocket                      | [150] |
|       |               | Surface mineralized biphasic calcium phosphate ceramics (BCPs)                                              | Enhanced rabbit ulna segmental bone defect                            | [151] |
|       |               | Graphene oxide-modified silk fibroin/nanohydroxyapatite scaffold                                            | Completely healed rat calvarial bone defect healing                   | [152] |
|       |               | Biphasic calcium phosphate (BCP) bioceramic ornamented with chitosan sponges (CS) (CS/BCP) hybrid scaffold  | Promoted ulna segmental bone defect healing                           | [153] |

|       |                                |                                                                                                            |                                                                                                                        |       |
|-------|--------------------------------|------------------------------------------------------------------------------------------------------------|------------------------------------------------------------------------------------------------------------------------|-------|
|       | BMP2                           | Chitosan microspheres/type I collagen hydrogel (BMP2-CSM/Col I hydrogel) 1                                 | Enhanced bone formation in rat calvarial bone defect                                                                   | [154] |
|       |                                | 3D-printed poly( $\epsilon$ -caprolactone) (PCL) scaffold                                                  | Enhanced calvarial bone defect healing in rabbit                                                                       | [155] |
|       |                                | 3D-printed polylactic acid and hydroxyapatite (PLA/HA) composite scaffold                                  | Enhanced rat calvarial bone defect healing                                                                             | [156] |
|       | Exosome                        |                                                                                                            | Decreased osteolysis and increased bone formation                                                                      | [104] |
|       | Exosome                        | Gelatin methacrylate (GelMA) and hyaluronic acid methacrylate (HA-MA)/nano-hydroxyapatite (nHAP) hydrogels | Promoted rat calvarial defect healing                                                                                  | [158] |
| SCAPs | Mini-Pig SCAP                  | HA/TCP                                                                                                     | Formed bio-roots to support porcelain crown                                                                            | [159] |
|       | Human SCAP+IGF1                | Absorbable gelatin sponges                                                                                 | Formed bone in renal ectopic bone formation model when treated with IGF-1 or formed dentin when not treated with IGF-1 | [161] |
|       | Mouse SCAP-Adeno-BMP9          | N/A                                                                                                        | Formed bone and cartilage in dorsal flank ectopic bone formation model                                                 | [162] |
|       | Mouse SCAP-AdenoBMP9 and Wnt3A | N/A                                                                                                        | Formed significant more trabecular bone in dorsal flank                                                                | [163] |

|  |                                        |                                     |                                                                            |       |
|--|----------------------------------------|-------------------------------------|----------------------------------------------------------------------------|-------|
|  | Human SCAP-BMP2                        | PLLA or PLGA Nano Fiber-Microsphere | Formed bone in mouse dorsal flank                                          | [164] |
|  | Canine delivered with peripheral blood | N/A                                 | Formed dentine tubule like structure in dog periapical periodontitis model | [165] |
|  | Human SCAP                             | N/A                                 | Enhanced periodontal tissue regeneration in mini-pig periodontitis Model   | [166] |
|  | Human SCAP-DLX5                        | N/A                                 | Enhanced bone formation in mice dorsal flank ectopic bone formation model  | [167] |
|  | Human SCAP-SDF1 $\alpha$ and BMP2      | N/A                                 | Enhanced bone formation in mice dorsal flank ectopic bone formation model  | [168] |
|  | Human SCAP-SFRP2                       | N/A                                 | Enhanced bone formation in mini-pig Periodontitis model                    | [169] |
|  | Human SCAP-PDGFB                       | Thermosensitive hydrogel            | Enhanced calvarial bone defect in 5mm defects of SD rats                   | [170] |
|  | Human SCAP exosomes+human BMMSCs       | Gelatin sponge                      | Enhanced bone formation in mice dorsal flank model                         | [171] |

|       |                                                                         |                                                                                  |                                                                                                                          |       |
|-------|-------------------------------------------------------------------------|----------------------------------------------------------------------------------|--------------------------------------------------------------------------------------------------------------------------|-------|
|       | Human SCAP<br>exosome                                                   | Bioresponsive polyethylene glycol (PEG)/DNA hybrid hydrogel triggered by MMP9    | Enhanced mandible bone defect in SD rates                                                                                | [172] |
|       | Human SCAP<br>exosome stimulated with lower Intensity pulsed ultrasound | N/A                                                                              | Improved Bone healing in mouse periodontitis model                                                                       | [173] |
| iPSCs | SATB2 over expression mouse iPSCs                                       | Silk scaffold                                                                    | Improved calvarial bone defect healing                                                                                   | [179] |
|       | Non-human primate iPSCs derived mesoderm cells                          | Plasma clot                                                                      | Formed new bone without teratoma formation                                                                               | [180] |
|       | Mouse iPSCs derived MSCs                                                | Biomimetic nanofibers of hydroxyapatite/collagen/chitosan (HAp/Col/CTS) scaffold | Increased bone regeneration 2-fold                                                                                       | [181] |
|       | Human iPSCs derived early and later MSCs/plasmid-BMP6                   | Collagen type I biodegradable scaffolds                                          | Repaired rabbit radial defect as efficient as bone marrow MSCs                                                           | [182] |
|       | Human iPSCs derived mesoderm cells grown cartilage pellets              | N/A                                                                              | Near complete healing of 5mm calvarial defect in rats                                                                    | [183] |
|       | Rat iPSCs culture in BMP6 osteogenic medium                             | Chitosan/gelatin/glycerol phosphate hydrogel                                     | Increased bone and cementum formation in maxillary-molar defects                                                         | [184] |
|       | Human iPSCs-derived MSCs                                                | Calcium phosphate granules (CPG)                                                 | Regenerated significantly better bone than scaffold and similar as autologous BMC in mini-pig critical size tibia defect | [185] |
|       | Human iPSCs differentiated in retinoic acid                             | Three-dimensionally printed Ti6Al4V (3DTi) scaffold                              | Formed osteocytes in 10 days in rat                                                                                      | [186] |

|  |                                                   |                                                |                                                                                                           |       |
|--|---------------------------------------------------|------------------------------------------------|-----------------------------------------------------------------------------------------------------------|-------|
|  |                                                   |                                                | mandibular bone defect.                                                                                   |       |
|  | Human ONFH derived iPSCs derived MSCs             | N/A                                            | Prevented bone loss and repair of rat ONFH                                                                | [187] |
|  | Human urine cells generated iPSCs derived MSCs    | Hydroxyapatite-zirconia (HA/ZrO <sub>2</sub> ) | Promoted bone regeneration in rat skull defect                                                            | [188] |
|  | Human peripheral blood derived iPSCs derived MSCs | Collagen sponge scaffolds                      | Superior bone regeneration than scaffold group in rat critical size calvarial bone defect model           | [189] |
|  | Human iPSCs derived MSCs derived exosome          | $\beta$ -TCP scaffold                          | Promoted bone regeneration and angiogenesis in critical size calvarial bone defect in ovariectomized rats | [190] |

Note: References number match the reference number in the main text.

Supplemental Table S2. Summarized stem cells for different bone defect repair with references.

| Stem cells category | Species of stem cells | Calvarial defect                          | Long bone defect                                               | Maxillary/mandible | Other models                                          |
|---------------------|-----------------------|-------------------------------------------|----------------------------------------------------------------|--------------------|-------------------------------------------------------|
| BMMSCs              | Human                 | Enhanced bone defect healing [14, 16, 32] | Enhanced condyle defect [12], or femur defect healing [27, 30] |                    | Increased bone matrix Ectopic bone model [28, 29, 33] |
|                     | Mouse                 |                                           | Enhanced Tibia defect [26]                                     |                    |                                                       |
|                     | Rat                   | Enhanced defect healing [13, 23, 24, 31]  | Robust bone formation [22]                                     |                    |                                                       |
|                     | Mini-pig              |                                           | Enhanced defect healing [17]                                   |                    |                                                       |

|                |             |                                                           |                                                            |                                               |                                                            |
|----------------|-------------|-----------------------------------------------------------|------------------------------------------------------------|-----------------------------------------------|------------------------------------------------------------|
|                | Canine MSCs | Enhanced defect healing [13]                              | Not as efficient as fresh MNMSCs [15]                      | Enhanced alveolar bone regeneration [13]      |                                                            |
| BMMSCs exosome | Human       | Robust bone regeneration [34, 37]                         | Promoted bone regeneration [35]                            |                                               |                                                            |
|                | Rat         | Robust bone regeneration [36]                             |                                                            |                                               |                                                            |
| MDSCs          | Human       | Significantly enhanced bone regeneration [55, 57-59]      |                                                            |                                               | Increased bone formation in Ectopic bone model [61, 62]    |
|                | Mouse       | Complete bone defect healing in 4-6 weeks [45, 48-54, 60] |                                                            |                                               |                                                            |
| ADSCs          | Human       | Near complete healing [67, 68, 81]                        | 7/8 femur bone defect bridging [71, 76, 78, 85]            |                                               | Generated bone ossicle Ectopic bone model [80]             |
|                | Mouse       | Significantly enhanced bone healing [66, 83]              | Enhanced femur fracture healing [84]                       |                                               |                                                            |
|                | rat         | Significantly enhanced bone healing [77]                  | Complete bridging radial defect [72]                       |                                               |                                                            |
|                | Canine      |                                                           | Significantly enhanced radial bone defect healing [69, 79] |                                               |                                                            |
|                | Rabbit      |                                                           | Radial bone defect complete healed with lamellar bone [74] |                                               | Promoted osteonecrosis femur head (ONFH) regeneration [82] |
|                | Mini-pig    |                                                           |                                                            | Regenerated more bone than no cell group [75] |                                                            |
| ADSCs exosome  | Human       | Enhanced defect healing                                   |                                                            |                                               |                                                            |

|                  |                                                                     |                                                                         |                                                                                               |                                                                                                                    |                                                                                                      |
|------------------|---------------------------------------------------------------------|-------------------------------------------------------------------------|-----------------------------------------------------------------------------------------------|--------------------------------------------------------------------------------------------------------------------|------------------------------------------------------------------------------------------------------|
|                  |                                                                     | but not healed<br>[87-89]                                               |                                                                                               |                                                                                                                    |                                                                                                      |
|                  | Rat small<br>Extracellular<br>vesicle                               |                                                                         | Enhanced<br>femur<br>defect<br>healing[90]                                                    |                                                                                                                    |                                                                                                      |
| ADSCs-<br>miRNAs | Human, miR-<br>450b<br>overexpressio<br>n, miR-150-5p<br>inhibition |                                                                         |                                                                                               |                                                                                                                    | Enhanced<br>ectopic bone<br>formation[91,<br>92]                                                     |
| DPSCs            | Human                                                               | Enhanced<br>calvarial bone<br>defect healing<br>[100, 109, 112,<br>114] | Improved<br>rabbit tibia<br>defect [107]<br>Promoted<br>Tibia<br>fracture<br>healing<br>[113] | mandibular ramus<br>critical bone defect<br>[102-104],<br>miniature pig<br>periodontitis with<br>bone defects[105] | Enhanced<br>ectopic bone<br>formation [97,<br>114]; Enhanced<br>distraction<br>osteogenesis[11<br>0] |
|                  | Rat                                                                 |                                                                         |                                                                                               | Promoted rat<br>mandibular<br>congenital defects<br>[106]                                                          | Enhanced bone<br>formation [98]                                                                      |
|                  | Rabbit                                                              | Enhanced<br>calvarial bone<br>defect healing<br>than scaffold<br>[115]  |                                                                                               | Enhanced alveolar<br>bone formation<br>[101]                                                                       |                                                                                                      |
|                  | Canine                                                              |                                                                         |                                                                                               | Enhanced alveolar<br>bone formation<br>[111]                                                                       |                                                                                                      |
|                  | Mouse                                                               | Enhanced<br>calvarial bone<br>defect healing<br>[116]                   |                                                                                               |                                                                                                                    |                                                                                                      |
|                  | Human<br>PDLSCs<br>exosome or<br>extracellular<br>vesicles          |                                                                         |                                                                                               | Enhanced alveolar<br>bone formation<br>[117, 118]                                                                  |                                                                                                      |
| PSCs             | Human                                                               |                                                                         |                                                                                               |                                                                                                                    | Robust bone<br>formation in<br>ectopic<br>formation<br>model [121, 124]                              |
|                  | Mouse                                                               |                                                                         | Complete<br>healing of<br>femoral<br>defect [120]                                             |                                                                                                                    |                                                                                                      |
|                  | Sheep                                                               |                                                                         | Enhanced<br>healing in<br>3cm defect                                                          |                                                                                                                    |                                                                                                      |

|         |               |                                                                 |                                                          |                                                        |                                                                                                          |
|---------|---------------|-----------------------------------------------------------------|----------------------------------------------------------|--------------------------------------------------------|----------------------------------------------------------------------------------------------------------|
|         |               |                                                                 | 4.5cm tibia defect healing when combined with BMP2 [122] |                                                        |                                                                                                          |
|         | Rat           |                                                                 | Increased implant integration in femur [125]             | Increased implant integration in mandible defect [125] |                                                                                                          |
|         | Rabbit        | Enhanced calvarial bone defect [126]                            |                                                          |                                                        |                                                                                                          |
| AFDSCs  | Human         | Enhanced calvarial bone defect healing [100, 130]               | Completely healed rabbit tibia defect in 4 weeks [129]   |                                                        | Enhanced bone formation in subcutaneous ectopic bone [127]                                               |
|         | Rat           | Enhanced calvarial bone defect repair [132]                     |                                                          | Repaired alveolar bone defect [131]                    |                                                                                                          |
| PBMSCs  | Human         |                                                                 |                                                          |                                                        | Regenerated bone in ectopic bone formation model[138]                                                    |
|         | Rabbit        |                                                                 | Enhanced rabbit Ulna defect [133, 135, 136]              | Repaired mouse mouse root canal [134]                  |                                                                                                          |
|         | Mouse         | Induced bone formation in mouse calvarial bone defect[137]      |                                                          |                                                        |                                                                                                          |
| UC-MSCs | Human         | Significantly promoted calvarial bone defect healing [142, 143] |                                                          |                                                        | Formed bone in ectopic bone formation model [139, 140], Decreased necrosis volume of ONFH in human [141] |
|         | Human Exosome | Enhanced rat calvarial bone defect healing [144, 147]           |                                                          |                                                        | Prevented bone loss increased bone strength [145]                                                        |
| UDSCs   | Human         | Completely healed calvarial bone                                | Healing of rat femur segmental                           |                                                        | Enhanced ectopic bone formation in                                                                       |



|       |                                                                      |                                                               |                       |                                                                                       |                                                                                                                   |
|-------|----------------------------------------------------------------------|---------------------------------------------------------------|-----------------------|---------------------------------------------------------------------------------------|-------------------------------------------------------------------------------------------------------------------|
|       |                                                                      | defect in 12 weeks [152] or enhanced defect healing [154-156] | bone defect[148, 151] |                                                                                       | muscle pocket [149, 150]                                                                                          |
|       | Human exosome                                                        | Promoted rat calvarial bone defect healing [158]              |                       |                                                                                       | Decreased osteolysis and increased bone formation [157]                                                           |
| SCAP  | Mini-Pig                                                             |                                                               |                       | Promoted Bio-root formation to support porcelain crown [159]                          |                                                                                                                   |
|       | Human                                                                | Enhanced calvarial bone defect healing in SD rats [170]       |                       | Promoted periodontal tissue regeneration in a mini-pig-periodontitis model [166, 169] | Formed ectopic bone in renal capsule when treated with IGF-1, form dentin when use SCAP only [161, 164, 167, 168] |
|       | Mouse                                                                |                                                               |                       |                                                                                       | Formed bone in dorsal ectopic bone formation model [162, 163]                                                     |
|       | canine                                                               |                                                               |                       | Formed dentine tubule like structure in dog periapical periodontitis model [165]      |                                                                                                                   |
|       | Human SCAP exosome +human BMSCs                                      | Enhanced mandible defect healing in rat[172]                  |                       |                                                                                       | Increased ectopic bone formation in mice dorsal flank model [171]                                                 |
|       | Human SCAP exosome stimulated with lower Intensity pulsed ultrasound |                                                               |                       | Improved bone healing in mice periodontitis [172]                                     |                                                                                                                   |
| iPSCs | Mouse iPSCs transduced with SATB2                                    | Enhanced calvarial bone defect healing [179]                  |                       |                                                                                       |                                                                                                                   |
|       | Primate iPSCs                                                        |                                                               |                       |                                                                                       | Enhanced bone formation in mice dorsal subcutaneous                                                               |

|  |                                                                            |                                                                          |                                                                                                                                |                                                                       |                                                             |
|--|----------------------------------------------------------------------------|--------------------------------------------------------------------------|--------------------------------------------------------------------------------------------------------------------------------|-----------------------------------------------------------------------|-------------------------------------------------------------|
|  |                                                                            |                                                                          |                                                                                                                                |                                                                       | ectopic bone formation model [180]                          |
|  | Mouse iPSCs derived MSCs                                                   | Enhanced calvarial bone defect healing [181]                             |                                                                                                                                |                                                                       |                                                             |
|  | Human iPSCs derived iPSCs, BMP6                                            | Enhanced rat calvarial bone defect using cartilage pellets [183]         | Complete healing of radial defect in rabbit [182]                                                                              |                                                                       |                                                             |
|  | Rat iPSCs cultured in BMP6 osteogenic medium                               |                                                                          |                                                                                                                                | Promoted bone and cementum formation in maxillary-molar defects [184] |                                                             |
|  | Human iPSCs derived MSCs                                                   |                                                                          | Regenerated significantly better bone than scaffold and similar as autologous BMC in mini-pig critical size tibia defect [185] | Promoted rat mandible bone defect [186]                               |                                                             |
|  | Human iPSCs derived from ONFH derived MSCs                                 |                                                                          |                                                                                                                                |                                                                       | Prevented bone loss and bone repair in ONFH rat model [187] |
|  | Human urine derived cells generated iPSCs derived MSCs                     | Promoted bone regeneration in rat skull defect [188]                     |                                                                                                                                |                                                                       |                                                             |
|  | Human peripheral blood mononuclear cells derived iPSCs derived osteoblasts | Superior bone formation in rat critical size calvarial bone defect [189] |                                                                                                                                |                                                                       |                                                             |
|  | Human iPSCs derived exosome                                                | Enhanced bone regeneration and angiogenesis                              |                                                                                                                                |                                                                       |                                                             |

|  |  |                                                                       |  |  |  |
|--|--|-----------------------------------------------------------------------|--|--|--|
|  |  | is<br>ovariectomize<br>d rats calvarial<br>bone defect<br>model [190] |  |  |  |
|--|--|-----------------------------------------------------------------------|--|--|--|

Note: Reference numbers match reference number in the main text.
